# Supplementary material for: Fabric Phase Sorptive Extraction Combined with HPLC-UV for the Quantitation of Amphotericin B in Human Urine
Source: MDPI journal article supplement (doi:10.3390/chemosensors10120537), 2022-12-15
Supplement: s1 [file s1]

## Supplementary information

### **Fabric phase sorptive extraction combined with HPLC-UV for the quantitation of amphotericin B in human urine**

Evmorfia Asimakopoulou<sup>1</sup>, Natalia Manousi<sup>2</sup>, Nikoleta Anaxagorou<sup>2</sup>, Abuzar Kabir<sup>3</sup>, Kenneth G. Furton<sup>3</sup> and Constantinos K. Zacharis <sup>2\*</sup>

<sup>1</sup>*Laboratory of Analytical Chemistry, Department of Chemistry, Aristotle University of Thessaloniki, Gr-54124 Thessaloniki, Greece*

<sup>2</sup>*Laboratory of Pharmaceutical Analysis, Department of Pharmaceutical Technology, School of Pharmacy, Aristotle University of Thessaloniki, Gr-54124, Greece*

<sup>3</sup>*Department of Chemistry and Biochemistry, Florida International University, Miami, FL 33199, USA*

---

\*Corresponding author

Constantinos K. Zacharis

Assistant Professor

Laboratory of Pharmaceutical Analysis, School of Pharmacy,  
Aristotle University of Thessaloniki (AUTH),

GR-54124, Greece

Tel: +30 2310997663

FAX: +30 2310997652

E-mail: czacharis@pharm.auth.gr

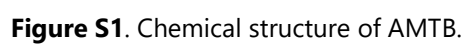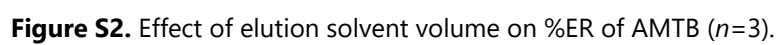

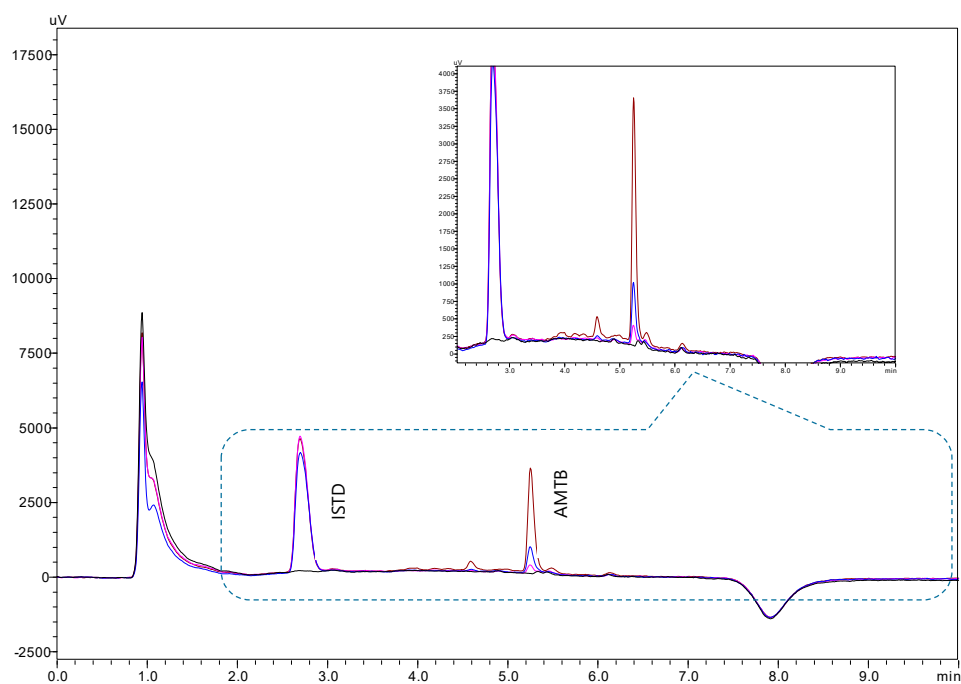

**Figure S3.** Representative HPLC-UV chromatograms of the analysis blank urine and spiked at concentration levels of 0.25, 1.0 and 5.0  $\mu\text{g mL}^{-1}$  after FPSE.

**Table S1.** Characteristics of FPSE membranes and the molar ratio of the reagents used for their preparation.

| <b>FPSE material</b>    | <b>Sorbent loading mass (mg/cm<sup>2</sup>)</b> | <b>Polarity</b> | <b>Sol-gel precursor</b> | <b>MTMS<sup>1</sup></b> | <b>Acetone</b> | <b>DCM<sup>2</sup></b> | <b>TFA</b> | <b>water</b> |
|-------------------------|-------------------------------------------------|-----------------|--------------------------|-------------------------|----------------|------------------------|------------|--------------|
| Sol-gel PDMS            | 4.56                                            | Non-polar       | 0.04                     | 0.07                    | 0.16           | 0.14                   | 0.04       | 0.01         |
| Sol-gel C <sub>18</sub> | 4.88                                            | Non-polar       | 0.04                     | 0.07                    | 0.16           | 0.14                   | 0.04       | 0.01         |
| Sol-gel PDMDPheS        | 5.02                                            | Non-polar       | 0.04                     | 0.07                    | 0.16           | 0.14                   | 0.04       | 0.01         |

<sup>1</sup> MTMS: methyl trimethoxysilane<sup>2</sup> DCM: dichloromethane
